# Supplementary material
Source: publisher site journal article supplement (https://www.dovepress.com/get_supplementary_file.php?f=396198.xlsx)
Supplement: Supplementary file 1 [file get_supplementary_file.php]

## Sheet: Sheet1
Publication name	Year	Motor symptoms	Cohort	Technology type
Body-worn sensors capture variability, but not decline, of gait and balance measures in multiple sclerosis over 18 months	2014	1	MS	1
Feasibility and effects of home-based smartphone-delivered automated feedback training for gait in people with Parkinson's disease: a pilot randomized controlled trial	2016	1	PD	1
Wearable Sensor-Based Biofeedback Training for Balance and Gait in Parkinson Disease: A Pilot Randomized Controlled Trial	2017	1	PD	1
Home-based exercise using balance disc and smartphone inclinometer application improves balance and activity of daily living in individuals with stroke: A randomized controlled trial	2022	1	SS	1
Immediate effects of rhythmic auditory stimulation on gait kinematics in Parkinson’s disease ON/OFF medication	2019	1	PD	2
A training program to improve gait while dual tasking in patients with Parkinson's disease: a pilot study	2012	1	PD	2
Commentary on "An intensive virtual reality program improves functional balance and mobility of adolescents with cerebral palsy"	2011	1	CP	4
Impact of a virtual reality-based intervention on motor performance and balance of a child with cerebral palsy: a case study	2014	1	CP	4
Treadmill Training with Virtual Reality Improves Gait, Balance, and Muscle Strength in Children with Cerebral Palsy	2016	1	CP	4
Effect of immersive virtual reality on balance, mobility, and fatigue in patients with multiple sclerosis: A single-blinded randomized controlled trial	2020	1	MS	4
Locomotor training and virtual reality-based balance training for an individual with multiple sclerosis: a case report	2005	1	MS	4
Parkinson's disease and virtual reality rehabilitation: cognitive reserve influences the walking and balance outcome	2021	1	PD	4
The effects of augmented and virtual reality gait training on balance and gait in patients with Parkinson's disease	2023	1	PD	4
Virtual reality in research and rehabilitation of gait and balance in Parkinson disease	2020	1	PD	4
Virtual Reality Rehabilitation Versus Conventional Physical Therapy for Improving Balance and Gait in Parkinson's Disease Patients: A Randomized Controlled Trial	2019	1	PD	4
At-home training with closed-loop augmented-reality cueing device for	2010	1	PD	4
Augmented reality-based dance intervention for individuals with Parkinson’s disease: A pilot study	2020	1	PD	4
Listenmee® and Listenmee® smartphone application: Synchronizing walking to rhythmic auditory cues to improve gait in Parkinson’s disease	2014	1	PD	4
A Preliminary Study of Dual-Task Training Using Virtual Reality: Influence on Walking and Balance in Chronic Poststroke Survivors	2019	1	SS	4
Autonomous rehabilitation at stroke patients home for balance and gait: safety, usability and compliance of a virtual reality system	2018	1	SS	4
Gait and balance training using virtual reality is more effective for improving gait and balance ability after stroke than conventional training without virtual reality [commentary]	2017	1	SS	4
Use of virtual reality to enhance balance and ambulation in chronic stroke: a double-blind, randomized controlled study	2009	1	SS	4
Virtual Reality Reflection Therapy Improves Balance and Gait in Patients with Chronic Stroke: Randomized Controlled Trials	2016	1	SS	4
Improved Balance, Gait, and Lower Limb Motor Function in a 58-Year-Old Man with Right Hemiplegic Traumatic Brain Injury Following Virtual Reality-Based Real-Time Feedback Physical Therapy	2023	1	TBI	4
Wearable adaptive resistance training improves ankle strength, walking efficiency and mobility in cerebral palsy: a pilot clinical trial	2020	1	CP	5
Effects of Robotic Exoskeleton-Aided Gait Training in the Strength, Body Balance, and Walking Speed in Individuals With Multiple Sclerosis: A Single-Group Preliminary Study	2021	1	MS	5
Robot-assisted gait training is not superior to balance training for improving postural instability in patients with mild to moderate Parkinson's disease: a single-blind randomized controlled trial	2015	1	PD	5
Efficacy of wearable device gait training on Parkinson's disease: A randomized controlled open-label pilot study	2022	1	PD	5
The effects of gait training using powered lower limb exoskeleton robot on individuals with complete spinal cord injury	2018	1	SCI	5
Effects of robot-assisted gait training on spatiotemporal gait parameters and balance in patients with chronic stroke: A randomized controlled pilot trial	2016	1	SS	5
Effects of Robot-Assisted Gait Training with Body Weight Support on Gait and Balance in Stroke Patients	2022	1	SS	5
Feasibility and efficacy of high-speed gait training with a voluntary driven exoskeleton robot for gait and balance dysfunction in patients with chronic stroke: nonrandomized pilot study with concurrent control	2015	1	SS	5
Robot-assisted gait training for balance and lower extremity function in patients with infratentorial stroke: a single-blinded randomized controlled trial	2019	1	SS	5
Treadmill training with tilt sensor functional electrical stimulation for improving balance, gait, and muscle architecture of tibialis anterior of survivors with chronic stroke: A randomized controlled trial	2015	1	SS	5
Effects of a wearable exoskeleton stride management assist system (SMA®) on spatiotemporal gait characteristics in individuals after stroke: a randomized controlled trial	2015	1	SS	5
Effects of gait training using the Hybrid Assistive Limb® in recovery-phase stroke patients: a 2-month follow-up, randomized, controlled study	2017	1	SS	5
Effects of wearable ankle robotics for stair and over-ground training on sub-acute stroke: a randomized controlled trial	2021	1	SS	5
Stride management assist exoskeleton vs functional gait training in stroke: a randomized trial	2019	1	SS	5
Training for walking efficiency with a wearable hip-assist robot in patients with stroke: a pilot randomized controlled trial	2019	1	SS	5
The effects of Robot-assisted gait training and virtual reality on balance and gait in stroke survivors: A randomized controlled trial	2023	1	SS	5
The effects of robot-assisted gait training using virtual reality and auditory stimulation on balance and gait abilities in persons with stroke	2018	1	SS	5
Continuous 12 min walking to music, metronomes and in silence: Auditory-motor coupling and its effects on perceived fatigue, motivation and gait in persons with multiple sclerosis	2019	1	MS	1 and 4
BeatWalk: Personalized music-based gait rehabilitation in Parkinson’s disease	2021	1	PD	1 and 4
Feasibility and Proof-of-Concept of Delivering an Autonomous Music-Based Digital Walking Intervention to Persons with Parkinson’s Disease in a Naturalistic Setting	2023	1	PD	1 and 4
Evaluation of the Keeogo exoskeleton for assisting ambulatory activities in people with multiple sclerosis: an open-label, randomized, cross-over trial	2018	1	MS	1 and 5
Effects of overground gait training assisted by a wearable exoskeleton in patients with Parkinson’s disease	2023	1	PD	1 and 5
Vibratory and plantar pressure stimulation: Steps to improve freezing of gait in Parkinson's disease	2022	2	PD	2
A Video Self-Modeling Intervention Using Virtual Reality Plus Physical Practice for Freezing of Gait in Parkinson Disease: Feasibility and Acceptability Study	2021	2	PD	4
Can google glass™ technology improve freezing of gait in parkinsonism? A pilot study	2020	2	PD	4
Do Patients With Parkinson's Disease With Freezing of Gait Respond Differently Than Those Without to Treadmill Training Augmented by Virtual Reality?	2023	2	PD	4
Dual Motor-Cognitive Virtual Reality Training Impacts Dual-Task Performance in Freezing of Gait	2015	2	PD	4
Long-term effect of robot-assisted treadmill walking reduces freezing of gait in Parkinson's disease patients: a pilot study	2013	2	PD	5
Overground robot assisted gait trainer for the treatment of drug-resistant freezing of gait in Parkinson disease	2015	2	PD	5
Reduction of freezing of gait in Parkinson's disease by repetitive robot-assisted treadmill training: a pilot study	2010	2	PD	5
Balance telerehabilitation and wearable technology for people with Parkinson's disease (TelePD trial)	2023	3	PD	1
Balance testing with inertial sensors in patients with Parkinson's disease: assessment of motor subtypes	2014	3	PD	1
Effects of a balance-based exergaming intervention using the Kinect sensor on posture stability in individuals with Parkinson's disease: a single-blinded randomized controlled trial	2016	3	PD	1
Effects of a Smartphone-Based Wearable Telerehabilitation System for In-Home Dynamic Weight-Shifting Balance Exercises by Individuals with Parkinson's Disease	2020	3	PD	1
Performing Dynamic Weight-Shifting Balance Exercises With a Smartphone-Based Wearable Telerehabilitation System for Home Use by Individuals With Parkinson's Disease: A Proof-of-Concept Study	2023	3	PD	1
Effects on balance skills and patient compliance of biofeedback training with inertial measurement units and exergaming in subacute stroke: a pilot randomized controlled trial	2018	3	SS	1
Tongue-based biofeedback for balance in stroke: results of an 8-week pilot study	2011	3	SS	1
Practice Variability Combined with Task-Oriented Electromyographic Biofeedback Enhances Strength and Balance in People with Chronic Stroke	2018	3	SS	3
An intensive virtual reality program improves functional balance and mobility of adolescents with cerebral palsy	2011	3	CP	4
Effect of posture control training using virtual reality program on sitting balance and trunk stability in children with cerebral palsy	2021	3	CP	4
Effect of Transcranial Direct Current Stimulation Combined With Virtual Reality Training on Balance in Children With Cerebral Palsy: A Randomized, Controlled, Double-Blind, Clinical Trial	2017	3	CP	4
Randomised trial of virtual reality gaming and physiotherapy on balance, gross motor performance and daily functions among children with bilateral spastic cerebral palsy	2021	3	CP	4
The Effect of Additional Virtual Reality Training on Balance in Children with Cerebral Palsy after Lower Limb Surgery: A Feasibility Study	2017	3	CP	4
The Rehabilitative Effects of Virtual Reality Games on Balance Performance among Children with Cerebral Palsy: A Meta-Analysis of Randomized Controlled Trials	2019	3	CP	4
Virtual Reality-Incorporated Horse Riding Simulator to Improve Motor Function and Balance in Children with Cerebral Palsy: A Pilot Study	2021	3	CP	4
A telerehabilitation program by virtual reality-video games improves balance and postural control in multiple sclerosis patients	2013	3	MS	4
Effect of virtual reality-based balance training in multiple sclerosis	2015	3	MS	4
Effects of Virtual Reality vs Conventional Balance Training on Balance and Falls in People With Multiple Sclerosis: A Randomized Controlled Trial	2021	3	MS	4
The effect of balance training on postural control in people with multiple sclerosis using the CAREN virtual reality system: a pilot randomized controlled trial	2016	3	MS	4
Audio-biofeedback training for posture and balance in patients with Parkinson's disease	2011	3	PD	4
Combined effects of virtual reality techniques and motor imagery on balance, motor function and activities of daily living in patients with Parkinson's disease: a randomized controlled trial	2022	3	PD	4
Effects of virtual reality-augmented balance training on sensory organization and attentional demand for postural control in people with Parkinson disease: a randomized controlled trial	2011	3	PD	4
Home-based virtual reality balance training and conventional balance training in Parkinson's disease: A randomized controlled trial	2016	3	PD	4
Virtual Reality-Based Training to Improve Obstacle-Crossing Performance and Dynamic Balance in Patients With Parkinson's Disease	2015	3	PD	4
Improvement of balance after audio-biofeedback. A 6-week intervention study in patients with progressive supranuclear palsy	2010	3	SP	4
Balance Training in Virtual Reality Promotes Performance Improvement but Not Transfer to Postural Control in People with Chronic Stroke	2019	3	SS	4
Does the addition of virtual reality training to a standard program of inpatient rehabilitation improve sitting balance ability and function after stroke? Protocol for a single-blind randomized controlled trial	2016	3	SS	4
Effectiveness, Usability, and Cost-Benefit of a Virtual Reality–Based Telerehabilitation Program for Balance Recovery After Stroke: A Randomized Controlled Trial	2015	3	SS	4
Effects of Balance Training Using a Virtual Reality Program in Hemiplegic Patients	2022	3	SS	4
Effects of the brain-damaged side after stroke on the learning of a balance task in a non-immersive virtual reality environment	2022	3	SS	4
Effects of the home-based exercise program with an augmented reality system on balance in patients with stroke: a randomized controlled trial	2023	3	SS	4
Effects of vestibular rehabilitation therapy versus virtual reality on balance, dizziness, and gait in patients with subacute stroke: A randomized controlled trial	2023	3	SS	4
Effects of Virtual Reality Training Using Xbox Kinect on Balance, Postural Control, and Functional Independence in Subjects with Stroke	2023	3	SS	4
Game-Based Virtual Reality Canoe Paddling Training to Improve Postural Balance and Upper Extremity Function: A Preliminary Randomized Controlled Study of 30 Patients with Subacute Stroke	2018	3	SS	4
Improvement in balance using a virtual reality-based stepping exercise: a randomized controlled trial involving individuals with chronic stroke	2015	3	SS	4
Improving balance skills in patients who had stroke through virtual reality treadmill training	2011	3	SS	4
Sitting Balance Exercise Performed Using Virtual Reality Training on a Stroke Rehabilitation Inpatient Service: A Randomized Controlled Study	2020	3	SS	4
Stable or able? Effect of virtual reality stimulation on static balance of post-stroke patients and healthy subjects	2020	3	SS	4
Telerehabilitation using virtual reality task can improve balance in patients with stroke	2012	3	SS	4
The Effect of a Virtual Reality Game Intervention on Balance for Patients with Stroke: A Randomized Controlled Trial	2017	3	SS	4
Virtual-reality balance training with a video-game system improves dynamic balance in chronic stroke patients	2012	3	SS	4
Assessment and rehabilitation of central sensory impairments for balance in mTBI using auditory biofeedback: a randomized clinical trial	2017	3	TBI	4
Benefits of activity and virtual reality based balance exercise programmes for adults with traumatic brain injury: perceptions of participants and their caregivers	2005	3	TBI	4
BioTrak virtual reality system: effectiveness and satisfaction analysis for balance rehabilitation in patients with brain injury	2013	3	TBI	4
Virtual reality-based therapy for the treatment of balance deficits in patients receiving inpatient rehabilitation for traumatic brain injury	2014	3	TBI	4
Balance rehabilitation therapy by tongue electrotactile biofeedback in patients with degenerative cerebellar disease	2012	3	CP	5
Characteristics of improvements in balance control using vibro-tactile biofeedback of trunk sway for multiple sclerosis patients	2021	3	MS	5
Feasibility and Safety of a Powered Exoskeleton for Balance Training for People Living with Multiple Sclerosis: A Single-Group Preliminary Study (Rapper III)	2022	3	MS	5
The effect of vibrotactile biofeedback of trunk sway on balance control in multiple sclerosis	2016	3	MS	5
Robot-based assessment of sitting and standing balance: preliminary results in Parkinson's disease	2019	3	PD	5
The Effects of Coding Schemes on Vibrotactile Biofeedback for Dynamic Balance Training in Parkinson's Disease and Healthy Elderly Individuals	2018	3	PD	5
Comparison of the effects on dynamic balance and aerobic capacity between objective and subjective methods of high-intensity robot-assisted gait training in chronic stroke patients: a randomized controlled trial	2017	3	SS	5
Effects of Balance Exercise Assist Robot training for patients with hemiparetic stroke: a randomized controlled trial	2022	3	SS	5
Effects of robot-assisted trunk control training on trunk control ability and balance in patients with stroke: A randomized controlled trial	2022	3	SS	5
Feasibility of robot-based perturbed-balance training during treadmill walking in a high-functioning chronic stroke subject: a case-control study	2018	3	SS	5
Knee Exoskeleton Reduces Muscle Effort and Improves Balance During Sit-to-Stand Transitions After Stroke: A Case Study	2022	3	SS	5
Haptic-based perception-empathy biofeedback system for balance rehabilitation in patients with chronic stroke: Concepts and initial feasibility study	2018	3	SS	5
Effect of using a wearable device on clinical decision-making and motor symptoms in patients with Parkinson's disease starting transdermal rotigotine patch: a pilot study	2019	4	PD	1
Long-term tremor therapy for Parkinson and essential tremor with sensor-guided botulinum toxin type A injections	2017	4	PD-ET	1
Electromyographic (EMG) biofeedback in the comprehensive treatment of central pain and ataxic tremor following thalamic stroke	2000	4	SS	3
The effect of inertial loading on wrist kinetic tremor and rhythmic muscle activity in individuals with essential tremor	2011	4	ET	5
The effect of inertial loading on wrist postural tremor in essential tremor	2009	4	ET	5
Motor symptoms
1. Gait disturbances
2. Freezing of gait (FoG)
3. Balance
4. Tremor
Technology type
1. Group 1: Inertial sensors
2. Group 2: Pressure and force measurement devices
3. Group 3: Electromyography (EMG)
4. Group 4: Interactive and immersive technologies
5. Group 5: Wearable assistive robotic systems
